# Supplementary material for: Automated DNA extraction platforms offer solutions to challenges of assessing microbial biofouling in oil production facilities
Source: PubMed Central journal article supplement (PMC3539857; doi:10.1186/2191-0855-2-60), 2012-11-20
Supplement: 2191-0855-2-60-S1.pdf [file 2191-0855-2-60-S1.pdf]

**Article title:** Automated DNA Extraction Platforms Offer Solutions to Challenges of Assessing Microbial Biofouling in Oil Production Facilities

**Journal name:** AMB Express

**Author names:** Athenia L. Oldham, Heather S. Drilling, Blake W. Stamps, Bradley S. Stevenson, Kathleen E. Duncan

**Corresponding author:** Athenia L. Oldham, University of Oklahoma, 770 Van Vleet Oval GLCH 136, Norman, OK 73019, USA. email: athenia.L.oldham-1@ou.edu; phone: 405-625-0535; fax: 405-325-3180

**Table S1**

List of 8nt barcodes for 454 pyrosequencing.

| <b>Barcode sequence</b> | <b>Sample</b> | <b>Extraction Library</b> |
|-------------------------|---------------|---------------------------|
| CACAACTG                | A             | Maxwell                   |
| CACAACAC                | A             | PowerBiofilm              |
| CAAGTGGA                | A             | QuickGene                 |
| CACACACA                | B             | Maxwell                   |
| CACAAGTC                | B             | PowerBiofilm              |
| CACAAGAG                | B             | QuickGene                 |
| CACACTGA                | C             | Maxwell                   |
| CACACTCT                | C             | PowerBiofilm              |
| CACACAGT                | C             | QuickGene                 |
|                         |               |                           |
| CAAGGAAC                | A             | Maxwell replicate #1      |
| CAAGGATG                | A             | Maxwell replicate #2      |
| CAAGGTAG                | A             | Maxwell replicate #3      |
| CAAGGTTC                | A             | PowerBiofilm replicate #1 |
| CAAGTCCA                | A             | PowerBiofilm replicate #2 |
| CAAGTCGT                | A             | PowerBiofilm replicate #3 |

**Table S2**Measures of alpha diversity for each library.<sup>a</sup>

| <b>Sample A library</b> | <b>% Library coverage<sup>b</sup></b> | <b>OTUs<sup>c</sup></b> | <b>Chao<sup>d</sup></b> | <b>ACE<sup>e</sup></b> | <b>H<sup>^f</sup></b> | <b>Simpson (D)<sup>g</sup></b> |
|-------------------------|---------------------------------------|-------------------------|-------------------------|------------------------|-----------------------|--------------------------------|
| Maxwell#1               | 0.964                                 | 122                     | 308<br>(215,495)        | 455<br>(371,567)       | 2.76                  | 0.157<br>(0.145,0.168)         |
| Maxwell#2               | 0.972                                 | 102                     | 191<br>(145,286)        | 305<br>(248,384)       | 2.20                  | 0.310<br>(0.289, 0.331)        |
| Maxwell#3               | 0.976                                 | 107                     | 150<br>(128,197)        | 218<br>(182,273)       | 2.28                  | 0.297<br>(0.276, 0.317)        |
| Powerbiofilm#1          | 0.972                                 | 103                     | 187<br>(144,275)        | 198<br>(153,282)       | 2.67                  | 0.162<br>(0.150, 0.175)        |
| Powerbiofilm#2          | 0.966                                 | 118                     | 276<br>(197,434)        | 387<br>(316,482)       | 2.83                  | 0.132<br>(0.123, 0.142)        |
| Powerbiofilm#3          | 0.967                                 | 114                     | 253<br>(184,390)        | 361<br>(289,463)       | 2.69                  | 0.174<br>(0.161, 0.188)        |

<sup>a</sup>Based on a random subsampling of 1958 sequences.<sup>b</sup>Good's coverage for an OTU definition.<sup>c</sup>OTU: operational taxonomic units<sup>d</sup>Chao richness estimator, mean value (95% low and high confidence intervals).<sup>e</sup>Abundance based coverage estimator (ACE), mean value (95% low and high confidence intervals).<sup>f</sup>Non-parametric estimate of the classical Shannon diversity index (H<sup>^</sup>).<sup>g</sup>Simpson index, mean value (95% low and high confidence intervals).
